# Supplementary material for: Recombinant GII.Pe-GII.4 Norovirus, Thailand, 2017–2018
Source: PubMed Central journal article supplement (PMC6649319; doi:10.3201/eid2508.190365), 2019-08
Supplement: 19-0365-Techapp-s1.pdf [file 19-0365-Techapp-s1.pdf]

# Recombinant GII.Pe-GII.4 Norovirus, Thailand, 2017–2018

## Appendix

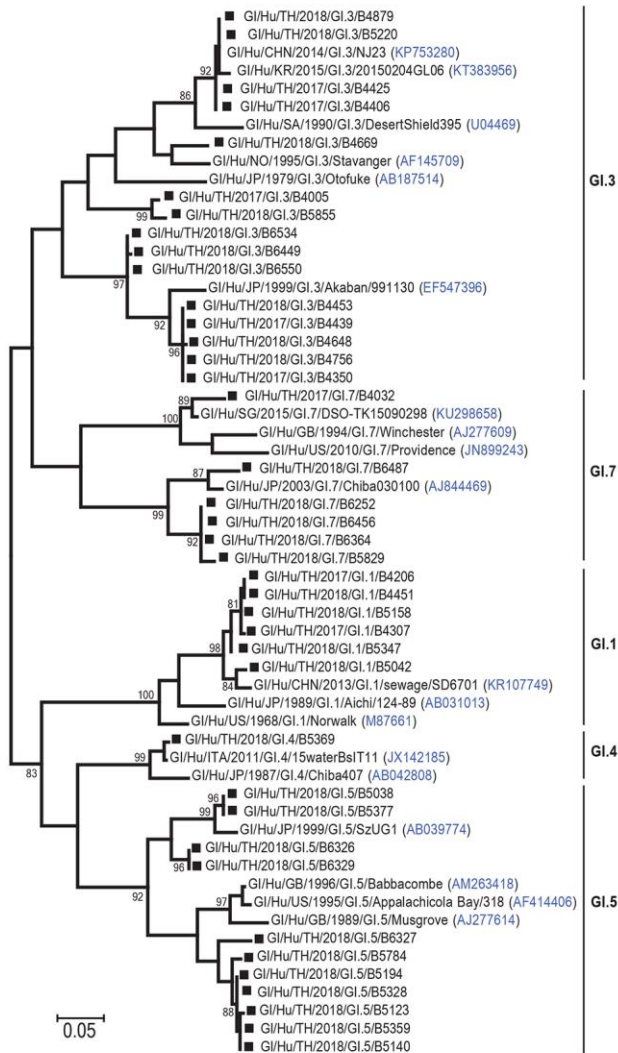

**Appendix Figure 1.** Phylogenetic tree of the norovirus GI partial nucleotide sequence of VP1. Trees were generated by using the maximum-likelihood method with 1,000 bootstrap replicates implemented in MEGA7 (<https://www.megasoftware.net>). Scale bar indicates nucleotide substitutions per site. Bootstrap values >80 are indicated at the nodes. Strains of sufficient nucleotide sequence length were included in the tree (denoted individually with squares). Reference strains are shown with accession numbers (parentheses).

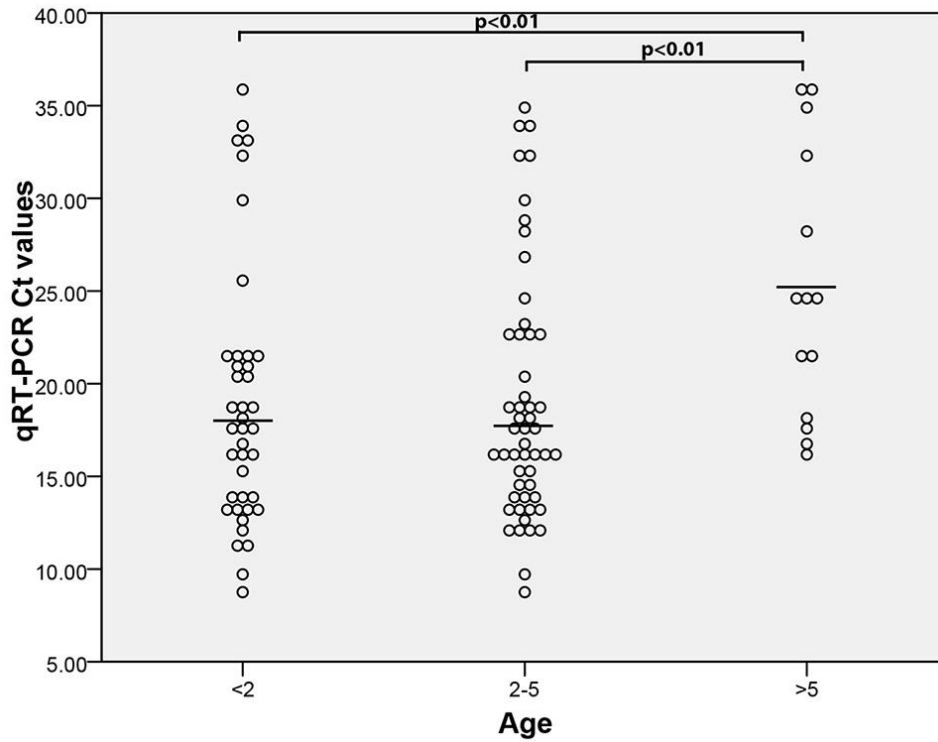

**Appendix Figure 2.** Box plot of the cycle threshold (C<sub>t</sub>) values for GII.Pe-GII.4 Sydney among patients stratified by age groups. Bar in each column indicates the group mean value.
